# Supplementary material for: Quantitative reconstruction of Early Cretaceous dune morphology in the Ordos paleo-desert and its paleoclimatic implications
Source: Frontiers journal article supplement (doi:10.3389/feart.2023.1142034), 2023-02-03
Supplement: Table_2.DOCX [file Table_2.DOCX]

**Supplementary Table S2** Database of study location information and measured and calculated dune morphology parameters of modern deserts (Hobq Desert and Mu Us Desert) in the Ordos Basin.

| **Modern dunes** | | | | **Measured dune morphology parameters** | | | | **Calculated dune morphology parameters** | | |
| --- | --- | --- | --- | --- | --- | --- | --- | --- | --- | --- |
| **Desert** | **Locality** | **GPS** | | **DW** | **WA** | **L** | **Data source** | **H** | **Data source** | **Reference** |
| Hobq | 1 | 109°07'49"E | 40°14'739"N | 262.45 | 147.09 | - | collected | 5.19 | collected | Du et al., 2013 |
| 2 | Southern part | | 124.13 | 88.04 | 15.63 | collected | 4.49 | collected | Du et al., 2011 |
| 114.95 | 72.99 | 12.01 | collected | 9.26 | collected | Du et al., 2011 |
| 3 | 108°53'10"E | 40°26'12"N | 91.48 | 127.6 | 20.31 | collected | 10.80 | collected | Zhang, 2019 |
| 94.32 | 130.23 | 21.83 | collected | 11.51 | collected | Zhang, 2019 |
| 4 | 108°53'4"E | 40°26'22"N | 97.08 | 80.58 | 23.41 | collected | 12.43 | collected | Zhang, 2019 |
| 97.98 | 81.42 | 24.16 | collected | 10.49 | collected | Zhang, 2019 |
| 5 | 108°53'2"E | 40°26'20"N | 63.99 | 91.02 | 17.87 | collected | 11.21 | collected | Zhang, 2019 |
| 64.64 | 91.28 | 18.26 | collected | 10.51 | collected | Zhang, 2019 |
| 6 | 108°53'10"E | 40°26'30"N | 66.69 | - | 12.05 | collected | 12.65 | collected | Zhang, 2019 |
| 67.27 | - | 12.34 | collected | 14.82 | collected | Zhang, 2019 |
| 99.66 | - | 14.03 | collected | 15.38 | collected | Zhang, 2019 |
| 48.23 | - | 10.06 | collected | 14.42 | collected | Zhang, 2019 |
| 86.6 | - | 14.49 | collected | 16.36 | collected | Zhang, 2019 |
| 78.48 | - | 13.21 | collected | 13.92 | collected | Zhang, 2019 |
| 68.42 | - | 12.95 | collected | 13.29 | collected | Zhang, 2019 |
| 53.6 | - | 11.51 | collected | 11.71 | collected | Zhang, 2019 |
| 47.52 | - | 10.08 | collected | 10.81 | collected | Zhang, 2019 |
| 7 | 107°45'0"E | 40°35'46"N | 146.03 | 198.7 | 10.01 | measured | 6.25 | calculated | this paper |
| 107.82 | 294.86 | 22.75 | measured | 14.22 | calculated | this paper |
| 70.14 | 138.35 | 9.53 | measured | 5.96 | calculated | this paper |
| 118.41 | 106.23 | 13.87 | measured | 8.67 | calculated | this paper |
| 8 | 107°44'22"E | 40°36'27"N | 129.18 | 148.03 | 12.64 | measured | 7.90 | calculated | this paper |
| 79.69 | 112.02 | 9.32 | measured | 5.82 | calculated | this paper |
| 67.2 | 66.86 | 4.66 | measured | 2.91 | calculated | this paper |
| 91.56 | 102.45 | 8.55 | measured | 5.34 | calculated | this paper |
| 109.27 | 206.6 | 11.95 | measured | 7.47 | calculated | this paper |
| 9 | 108°4'20"E | 40°37'38"N | 78.03 | 86.17 | 4.34 | measured | 2.71 | calculated | this paper |
| 76.57 | 112 | 12.25 | measured | 7.65 | calculated | this paper |
| 49.83 | 66.42 | 3.70 | measured | 2.31 | calculated | this paper |
| 75.99 | 101.06 | 7.38 | measured | 4.61 | calculated | this paper |
| 10 | 108°21'55"E | 40°35'27"N | 39.51 | 48.13 | 2.71 | measured | 1.69 | calculated | this paper |
| 29.73 | 63.78 | 2.82 | measured | 1.76 | calculated | this paper |
| 34.55 | 45.92 | 2.44 | measured | 1.52 | calculated | this paper |
| 11 | 108°34'45"E | 40°31'14"N | 39.94 | 59.84 | 6.36 | measured | 3.97 | calculated | this paper |
| 40.13 | 44.77 | 2.38 | measured | 1.49 | calculated | this paper |
| 37.58 | 73.29 | 5.08 | measured | 3.17 | calculated | this paper |
| 71.5 | 134.41 | 9.15 | measured | 5.72 | calculated | this paper |
| 48.66 | 74.98 | 9.16 | measured | 5.72 | calculated | this paper |
| 50.86 | 110.3 | 5.94 | measured | 3.71 | calculated | this paper |
| 50.93 | 93.47 | 6.84 | measured | 4.27 | calculated | this paper |
| 12 | 108°54'29"E | 40°24'31"N | 87.04 | 136.53 | 9.06 | measured | 5.66 | calculated | this paper |
| 144.93 | 244.06 | 17.58 | measured | 10.99 | calculated | this paper |
| 111.29 | 163 | 9.70 | measured | 6.06 | calculated | this paper |
| 123.95 | 195.61 | 17.54 | measured | 10.96 | calculated | this paper |
| 168.67 | 315.4 | 14.77 | measured | 9.23 | calculated | this paper |
| 92.32 | 166.52 | 9.25 | measured | 5.78 | calculated | this paper |
| 71.41 | 143.07 | 9.79 | measured | 6.12 | calculated | this paper |
| 70.05 | 117.62 | 5.93 | measured | 3.71 | calculated | this paper |
| 13 | 108°58'2"E | 40°24'13"N | 60.84 | 84.98 | 11.59 | measured | 7.24 | calculated | this paper |
| 86.04 | 159.56 | 10.32 | measured | 6.45 | calculated | this paper |
| 59.82 | 78.76 | 9.71 | measured | 6.07 | calculated | this paper |
| 58.45 | 76.58 | 9.99 | measured | 6.24 | calculated | this paper |
| 79.93 | 118.98 | 7.23 | measured | 4.52 | calculated | this paper |
| 68.46 | 91.31 | 8.92 | measured | 5.57 | calculated | this paper |
| 14 | 109°9'5"E | 40°22'57"N | 54.04 | 55.04 | 6.97 | measured | 4.36 | calculated | this paper |
| 52.62 | 70.52 | 3.27 | measured | 2.04 | calculated | this paper |
| 56.17 | 51.24 | 5.82 | measured | 3.64 | calculated | this paper |
| 47.08 | 53.17 | 5.07 | measured | 3.17 | calculated | this paper |
| 64.42 | 72.32 | 6.07 | measured | 3.79 | calculated | this paper |
| 90.59 | 113.64 | 7.02 | measured | 4.39 | calculated | this paper |
| 15 | 109°8'57"E | 40°22'28"N | 239.69 | 158.91 | 24.24 | measured | 15.15 | calculated | this paper |
| 179.19 | 223.79 | 27.01 | measured | 16.88 | calculated | this paper |
| 159.1 | 144.47 | 23.48 | measured | 14.67 | calculated | this paper |
| 179.48 | 204.5 | 34.85 | measured | 21.78 | calculated | this paper |
| 189.75 | 211.13 | 21.55 | measured | 13.47 | calculated | this paper |
| 129.66 | 178.51 | 18.19 | measured | 11.37 | calculated | this paper |
| 16 | 109°20'11"E | 40°21'37"N | 118.37 | 167.04 | 10.16 | measured | 6.35 | calculated | this paper |
| 73.98 | 83.44 | 4.00 | measured | 2.50 | calculated | this paper |
| 66.88 | 77.75 | 3.41 | measured | 2.13 | calculated | this paper |
| 69.18 | 89.85 | 3.50 | measured | 2.19 | calculated | this paper |
| 66.21 | 83.71 | 7.11 | measured | 4.44 | calculated | this paper |
| 72.24 | 92.29 | 9.50 | measured | 5.94 | calculated | this paper |
| 17 | 109°26'44"E | 40°19'52"N | 109.91 | 140.61 | 18.98 | measured | 11.86 | calculated | this paper |
| 85.86 | 87.88 | 8.87 | measured | 5.54 | calculated | this paper |
| 98.7 | 101.9 | 7.60 | measured | 4.75 | calculated | this paper |
| 97.69 | 90.12 | 8.25 | measured | 5.16 | calculated | this paper |
| 78.17 | 101.16 | 8.59 | measured | 5.37 | calculated | this paper |
| 79.17 | 88.07 | 9.96 | measured | 6.22 | calculated | this paper |
| 88.1 | 170.28 | 18.83 | measured | 11.77 | calculated | this paper |
| 18 | 109°36'58"E | 40°15'40"N | 137.04 | 111.37 | 14.30 | measured | 8.94 | calculated | this paper |
| 151.21 | 215.16 | 23.79 | measured | 14.87 | calculated | this paper |
| 179.09 | 179.35 | 12.63 | measured | 7.89 | calculated | this paper |
| 98.57 | 121.09 | 15.00 | measured | 9.37 | calculated | this paper |
| 139.62 | 189.58 | 22.70 | measured | 14.18 | calculated | this paper |
| 19 | 109°54'7"E | 40°13'1"N | 180.44 | 209.03 | 27.61 | measured | 17.25 | calculated | this paper |
| 189.16 | 235.45 | 11.98 | measured | 7.49 | calculated | this paper |
| 74.4 | 130.36 | 9.59 | measured | 5.99 | calculated | this paper |
| 85.16 | 86.98 | 13.19 | measured | 8.24 | calculated | this paper |
| 20 | 108°32'58"E | 40°32'16"N | 48.17 | 47.63 | 4.57 | measured | 2.86 | calculated | this paper |
| 58.21 | 100.84 | 8.53 | measured | 5.33 | calculated | this paper |
| 56.58 | 119 | 6.23 | measured | 3.89 | calculated | this paper |
| 74.29 | 99.3 | 7.10 | measured | 4.44 | calculated | this paper |
| 48.23 | 132.57 | 9.71 | measured | 6.07 | calculated | this paper |
| 59.1 | 118.88 | 13.63 | measured | 8.52 | calculated | this paper |
| 21 | 108°50'41"E | 40°24'36"N | 82.61 | 85.45 | 9.38 | measured | 5.86 | calculated | this paper |
| 42.65 | 62.97 | 6.85 | measured | 4.28 | calculated | this paper |
| 96.64 | 76.5 | 9.50 | measured | 5.94 | calculated | this paper |
| 78.17 | 95.08 | 17.05 | measured | 10.65 | calculated | this paper |
| 47.79 | 72.4 | 5.33 | measured | 3.33 | calculated | this paper |
| 37.24 | 53.75 | 4.83 | measured | 3.02 | calculated | this paper |
| 22 | 109°10'10"E | 40°23'1"N | 131.49 | 114.54 | 12.40 | measured | 7.75 | calculated | this paper |
| 39.9 | 58.37 | 4.17 | measured | 2.61 | calculated | this paper |
| 52.77 | 69.19 | 4.35 | measured | 2.72 | calculated | this paper |
| 98.86 | 80.18 | 9.82 | measured | 6.14 | calculated | this paper |
| 60.64 | 62.07 | 12.48 | measured | 7.80 | calculated | this paper |
| 23 | 109°25'31"E | 40°19'56"N | 98.75 | 76.81 | 7.62 | measured | 4.76 | calculated | this paper |
| 52.81 | 40.89 | 6.96 | measured | 4.35 | calculated | this paper |
| 85.28 | 82.08 | 10.25 | measured | 6.40 | calculated | this paper |
| 24 | 109°51'35"E | 40°13'41"N | 71.92 | 94.01 | 10.59 | measured | 6.62 | calculated | this paper |
| 73.29 | 102.42 | 6.01 | measured | 3.76 | calculated | this paper |
| 27.9 | 50.45 | 3.81 | measured | 2.38 | calculated | this paper |
| 39.74 | 55.5 | 4.18 | measured | 2.61 | calculated | this paper |
| 82.79 | 86.12 | 11.49 | measured | 7.18 | calculated | this paper |
| 25 | 108°17'50"E | 40°38'10"N | 72.52 | 94.58 | 22.53 | measured | 14.08 | calculated | this paper |
| 56.68 | 105.16 | 16.97 | measured | 10.60 | calculated | this paper |
| 41.87 | 66.04 | 14.41 | measured | 9.00 | calculated | this paper |
| 71.13 | 139.51 | 18.81 | measured | 11.75 | calculated | this paper |
| 56.9 | 94.44 | 10.11 | measured | 6.32 | calculated | this paper |
| 27.31 | 56.21 | 14.75 | measured | 9.22 | calculated | this paper |
| 56.49 | 108.08 | 12.82 | measured | 8.01 | calculated | this paper |
| 26 | 108°34'40"E | 40°30'3"N | 91.7 | 135.51 | 19.16 | measured | 11.97 | calculated | this paper |
| 105.27 | 122.38 | 31.58 | measured | 19.73 | calculated | this paper |
| 93.66 | 131.82 | 21.87 | measured | 13.67 | calculated | this paper |
| 104.35 | 109.4 | 17.93 | measured | 11.20 | calculated | this paper |
| 77.14 | 100.58 | 13.29 | measured | 8.30 | calculated | this paper |
| 51.79 | 75.44 | 11.37 | measured | 7.10 | calculated | this paper |
| 66.94 | 91.73 | 22.24 | measured | 13.90 | calculated | this paper |
| 65.59 | 81.66 | 12.84 | measured | 8.02 | calculated | this paper |
| 76.04 | 127.62 | 18.81 | measured | 11.75 | calculated | this paper |
| 91.56 | 216.66 | 21.78 | measured | 13.61 | calculated | this paper |
| 27 | 108°40'19"E | 40°27'46"N | 95.08 | 164.44 | 29.2 | measured | 18.25 | calculated | this paper |
| 87.96 | 156.07 | 20.53 | measured | 12.83 | calculated | this paper |
| 131.57 | 167.3 | 26.6 | measured | 16.62 | calculated | this paper |
| 81.17 | 145.69 | 11.1 | measured | 6.94 | calculated | this paper |
| 90.19 | 134.34 | 15.77 | measured | 9.85 | calculated | this paper |
| 82.7 | 120.65 | 15.83 | measured | 9.89 | calculated | this paper |
| 68.8 | 86.08 | 11.15 | measured | 6.97 | calculated | this paper |
| 63.33 | 83.28 | 13.71 | measured | 8.57 | calculated | this paper |
| 79.33 | 162.91 | 15.55 | measured | 9.72 | calculated | this paper |
| 76.95 | 121.57 | 14.22 | measured | 8.89 | calculated | this paper |
| 89.64 | 100.04 | 21.34 | measured | 13.33 | calculated | this paper |
| 59.03 | 123.88 | 16.46 | measured | 10.29 | calculated | this paper |
| 123.94 | 141.19 | 19.06 | measured | 11.91 | calculated | this paper |
| 84.57 | 126.18 | 16.58 | measured | 10.36 | calculated | this paper |
| 77.01 | 119.36 | 16.45 | measured | 10.28 | calculated | this paper |
| 70.45 | 126.56 | 12.65 | measured | 7.90 | calculated | this paper |
| 28 | 108°52'47"E | 40°24'38"N | 85.06 | 92.7 | 22.8 | measured | 14.25 | calculated | this paper |
| 109.17 | 111.55 | 27.8 | measured | 17.37 | calculated | this paper |
| 129.79 | 195.84 | 24.49 | measured | 15.30 | calculated | this paper |
| 121.98 | 222.16 | 23.19 | measured | 14.49 | calculated | this paper |
| 101.28 | 125.64 | 20.76 | measured | 12.97 | calculated | this paper |
| 102.49 | 153.55 | 15.77 | measured | 9.85 | calculated | this paper |
| 115.34 | 162.89 | 26.67 | measured | 16.67 | calculated | this paper |
| 103.73 | 205.69 | 19.49 | measured | 12.18 | calculated | this paper |
| 116.76 | 156.92 | 20.5 | measured | 12.81 | calculated | this paper |
| 70.84 | 87.85 | 11.1 | measured | 6.94 | calculated | this paper |
| 67.85 | 77.59 | 7.33 | measured | 4.58 | calculated | this paper |
| 94.58 | 89.02 | 13.14 | measured | 8.21 | calculated | this paper |
| 29 | 109°9'10"E | 40°22'15"N | 102.38 | 110.85 | 28.09 | measured | 17.55 | calculated | this paper |
| 129.6 | 165.01 | 22.64 | measured | 14.15 | calculated | this paper |
| 128.8 | 160.97 | 24.55 | measured | 15.34 | calculated | this paper |
| 115.44 | 139.4 | 24.3 | measured | 15.18 | calculated | this paper |
| 80.56 | 151.79 | 24.7 | measured | 15.43 | calculated | this paper |
| 114.18 | 136.02 | 23.81 | measured | 14.88 | calculated | this paper |
| 109.29 | 130.8 | 26.48 | measured | 16.55 | calculated | this paper |
| 111.75 | 117.58 | 13.47 | measured | 8.42 | calculated | this paper |
| 30 | 109°20'22"E | 40°21'30"N | 103.08 | 117.49 | 16.71 | measured | 10.44 | calculated | this paper |
| 100.14 | 180.95 | 25.82 | measured | 16.13 | calculated | this paper |
| 62.44 | 54.52 | 10.75 | measured | 6.72 | calculated | this paper |
| 61.67 | 59.23 | 13.33 | measured | 8.33 | calculated | this paper |
| 82.21 | 55.52 | 18.39 | measured | 11.49 | calculated | this paper |
| 55.1 | 68.87 | 11.72 | measured | 7.32 | calculated | this paper |
| 94.54 | 94.36 | 20.28 | measured | 12.67 | calculated | this paper |
| 82.41 | 103.41 | 16.1 | measured | 10.06 | calculated | this paper |
| 128.51 | 149.66 | 26.56 | measured | 16.60 | calculated | this paper |
| 80.96 | 156.14 | 16.08 | measured | 10.05 | calculated | this paper |
| 31 | 109°26'45"E | 40°19'55"N | 99.27 | 90.39 | 10.79 | measured | 6.74 | calculated | this paper |
| 45.8 | 105.84 | 7 | measured | 4.37 | calculated | this paper |
| 51.05 | 60.45 | 10.48 | measured | 6.55 | calculated | this paper |
| 58.34 | 54.85 | 5.05 | measured | 3.16 | calculated | this paper |
| 87.59 | 87.75 | 12.05 | measured | 7.53 | calculated | this paper |
| 105.27 | 67.32 | 10.56 | measured | 6.60 | calculated | this paper |
| 26.5 | 37.86 | 8.03 | measured | 5.02 | calculated | this paper |
| 28.51 | 56.76 | 6.34 | measured | 3.96 | calculated | this paper |
| 70.52 | 110.52 | 10.28 | measured | 6.42 | calculated | this paper |
| 51.18 | 74.28 | 9.2 | measured | 5.75 | calculated | this paper |
| 45.93 | 80.56 | 10.03 | measured | 6.27 | calculated | this paper |
| 112.8 | 105.76 | 12.04 | measured | 7.52 | calculated | this paper |
| 32 | 109°38'58"E | 40°15'59"N | 83.67 | 128.67 | 18.33 | measured | 11.45 | calculated | this paper |
| 203.42 | 179.07 | 36.31 | measured | 22.69 | calculated | this paper |
| 135.42 | 169.33 | 25.17 | measured | 15.73 | calculated | this paper |
| 117.03 | 104.33 | 28.89 | measured | 18.05 | calculated | this paper |
| 176.31 | 232.48 | 34 | measured | 21.25 | calculated | this paper |
| 158.75 | 192.73 | 30 | measured | 18.75 | calculated | this paper |
| 98.45 | 120.11 | 21.87 | measured | 13.67 | calculated | this paper |
| 115.07 | 139.36 | 23.33 | measured | 14.58 | calculated | this paper |
| 158.91 | 140.86 | 32.63 | measured | 20.39 | calculated | this paper |
| 149.18 | 159.67 | 28.85 | measured | 18.03 | calculated | this paper |
| 150.74 | 146.62 | 24.38 | measured | 15.23 | calculated | this paper |
| 153.76 | 184.8 | 21.42 | measured | 13.38 | calculated | this paper |
| 144.14 | 146.52 | 20.7 | measured | 12.93 | calculated | this paper |
| 71.79 | 96.18 | 25.05 | measured | 15.65 | calculated | this paper |
| 57.4 | 72.62 | 11.29 | measured | 7.05 | calculated | this paper |
| 93.8 | 171.17 | 15.53 | measured | 9.70 | calculated | this paper |
| 106.96 | 183.88 | 18.56 | measured | 11.60 | calculated | this paper |
| 80.67 | 171.51 | 16.63 | measured | 10.39 | calculated | this paper |
| 168.56 | 214.21 | 20.82 | measured | 13.01 | calculated | this paper |
| 80.13 | 136.98 | 23.72 | measured | 14.82 | calculated | this paper |
| 122.7 | 161.99 | 22.58 | measured | 14.11 | calculated | this paper |
| 106.12 | 119 | 26.23 | measured | 16.39 | calculated | this paper |
| 59.65 | 127.43 | 12.1 | measured | 7.56 | calculated | this paper |
| 81.72 | 61.99 | 16.8 | measured | 10.50 | calculated | this paper |
| 108.58 | 251.94 | 16.73 | measured | 10.45 | calculated | this paper |
| 58.51 | 119.36 | 16.55 | measured | 10.34 | calculated | this paper |
| Max | | | 262.45 | 315.4 | 36.31 | analyzed | 22.68901 | analyzed | all data |
| Min | | | 26.5 | 37.86 | 2.38 | analyzed | 1.487189 | analyzed | all data |
| Mean | | | 89.93186 | 119.1896 | 14.64463 | analyzed | 9.313808 | analyzed | all data |
| Standard deviation | | | 39.03281 | 50.19508 | 7.476555 | analyzed | 4.727373 | analyzed | all data |
| Coefficient of variance | | | 43.40264 | 42.11364 | 51.05323 | analyzed | 50.75661 | analyzed | all data |
| Total | | | 215 | 206 | 214 | analyzed | 215 | analyzed | all data |
|  |  |  |  |  |  |  |  |  |  |  |
| Mu Us | 1 | 108°32'06"E | 39°09'21"N | 84 | 147 | 9 | collected | 6.00 | collected | Xu et al., 2020 |
| 82 | 158 | 15 | collected | 10.00 | collected | Xu et al., 2020 |
| 2 | 108°31'37"E | 39°09'39"N | 96 | 154 | 15 | collected | 10.00 | collected | Xu et al., 2020 |
| 120 | 140 | 10 | collected | 6.00 | collected | Xu et al., 2020 |
| 3 | 108°17'36"E-109°40'22"E | 37°38'54"N-39°23'50"N | 57 | 100 | 11 | collected | 6.87 | calculated | Wang et al., 2013 |
| 70 | 91 | 6 | collected | 3.75 | calculated | Wang et al., 2013 |
| 67 | 130 | 11 | collected | 6.87 | calculated | Wang et al., 2013 |
| 77 | 127 | 8 | collected | 5.00 | calculated | Wang et al., 2013 |
| 58 | 91 | 13 | collected | 8.12 | calculated | Wang et al., 2013 |
| 68 | 71 | 8 | collected | 5.00 | calculated | Wang et al., 2013 |
| 63 | 117 | 13 | collected | 8.12 | calculated | Wang et al., 2013 |
| 81 | 121 | 9 | collected | 5.62 | calculated | Wang et al., 2013 |
| 83 | 191 | 19 | collected | 11.87 | calculated | Wang et al., 2013 |
| 79 | 154 | 11 | collected | 6.87 | calculated | Wang et al., 2013 |
| 70 | 65 | 8 | collected | 5.00 | calculated | Wang et al., 2013 |
| 77 | 48 | 2 | collected | 1.25 | calculated | Wang et al., 2013 |
| 79 | 135 | 11 | collected | 6.87 | calculated | Wang et al., 2013 |
| 88 | 132 | 18 | collected | 11.25 | calculated | Wang et al., 2013 |
| 48 | 89 | 4 | collected | 2.50 | calculated | Wang et al., 2013 |
| 59 | 88 | 10 | collected | 6.25 | calculated | Wang et al., 2013 |
| 57 | 105 | 12 | collected | 7.50 | calculated | Wang et al., 2013 |
| 59 | 117 | 8 | collected | 5.00 | calculated | Wang et al., 2013 |
| 62 | 110 | 9 | collected | 5.62 | calculated | Wang et al., 2013 |
| 61 | 113 | 7 | collected | 4.37 | calculated | Wang et al., 2013 |
| 87 | 127 | 25 | collected | 15.62 | calculated | Wang et al., 2013 |
| 86 | 98 | 9 | collected | 5.62 | calculated | Wang et al., 2013 |
| 56 | 47 | 2 | collected | 1.25 | calculated | Wang et al., 2013 |
| 61 | 40 | 1 | collected | 0.62 | calculated | Wang et al., 2013 |
| 53 | 87 | 6 | collected | 3.75 | calculated | Wang et al., 2013 |
| 71 | 70 | 2 | collected | 1.25 | calculated | Wang et al., 2013 |
| 67 | 149 | 10 | collected | 6.25 | calculated | Wang et al., 2013 |
| 71 | 148 | 10 | collected | 6.25 | calculated | Wang et al., 2013 |
| 62 | 110 | 7 | collected | 4.37 | calculated | Wang et al., 2013 |
| 72 | 104 | 12 | collected | 7.50 | calculated | Wang et al., 2013 |
| 63 | 95 | 9 | collected | 5.62 | calculated | Wang et al., 2013 |
| 86 | 111 | 9 | collected | 5.62 | calculated | Wang et al., 2013 |
| 61 | 137 | 12 | collected | 7.50 | calculated | Wang et al., 2013 |
| 79 | 145 | 17 | collected | 10.62 | calculated | Wang et al., 2013 |
| 59 | 167 | 9 | collected | 5.62 | calculated | Wang et al., 2013 |
| 73 | 139 | 12 | collected | 7.50 | calculated | Wang et al., 2013 |
| 97 | 191 | 13 | collected | 8.12 | calculated | Wang et al., 2013 |
| 96 | 190 | 16 | collected | 10.00 | calculated | Wang et al., 2013 |
| 81 | 190 | 19 | collected | 11.87 | calculated | Wang et al., 2013 |
| 78 | 161 | 11 | collected | 6.87 | calculated | Wang et al., 2013 |
| 96 | 140 | 16 | collected | 10.00 | calculated | Wang et al., 2013 |
| 105 | 135 | 12 | collected | 7.50 | calculated | Wang et al., 2013 |
| 56 | 94 | 13 | collected | 8.12 | calculated | Wang et al., 2013 |
| 75 | 108 | 8 | collected | 5.00 | calculated | Wang et al., 2013 |
| 4 | 108°29'5"E | 39°12'36"N | 46.01 | 120.2 | 8.15 | measured | 5.09 | calculated | this paper |
| 64.59 | 105.36 | 18.08 | measured | 11.30 | calculated | this paper |
| 50.84 | 98.53 | 10.04 | measured | 6.27 | calculated | this paper |
| 49.43 | 72.8 | 7.58 | measured | 4.74 | calculated | this paper |
| 79.56 | 103.4 | 8.99 | measured | 5.62 | calculated | this paper |
| 69.2 | 80.63 | 14.19 | measured | 8.87 | calculated | this paper |
| 60.25 | 102.34 | 10.64 | measured | 6.65 | calculated | this paper |
| 62.67 | 80.05 | 8.79 | measured | 5.49 | calculated | this paper |
| 81.3 | 229.13 | 15.54 | measured | 9.71 | calculated | this paper |
| 105.23 | 226.8 | 19.71 | measured | 12.32 | calculated | this paper |
| 69.24 | 201.42 | 17.25 | measured | 10.78 | calculated | this paper |
| 65.65 | 105.35 | 14.42 | measured | 9.01 | calculated | this paper |
| 51.35 | 105.66 | 13.32 | measured | 8.32 | calculated | this paper |
| 129.53 | 136.96 | 15.41 | measured | 9.63 | calculated | this paper |
| 37.77 | 94.62 | 9.89 | measured | 6.18 | calculated | this paper |
| 59.1 | 83.38 | 13.84 | measured | 8.65 | calculated | this paper |
| 131.09 | 284.76 | 11.53 | measured | 7.20 | calculated | this paper |
| 81.26 | 193.55 | 12 | measured | 7.50 | calculated | this paper |
| 78.16 | 139.52 | 14.95 | measured | 9.34 | calculated | this paper |
| 5 | 108°26'3"E | 38°41'14"N | 91.48 | 107.9 | 24.80 | measured | 15.50 | calculated | this paper |
| 65.21 | 129.82 | 23.10 | measured | 14.43 | calculated | this paper |
| 93.56 | 169.89 | 22.18 | measured | 13.86 | calculated | this paper |
| 86.39 | 114.31 | 19.98 | measured | 12.48 | calculated | this paper |
| 73.11 | 92.57 | 9.51 | measured | 5.94 | calculated | this paper |
| 78.88 | 115.6 | 19.34 | measured | 12.08 | calculated | this paper |
| 100.84 | 134.83 | 26.61 | measured | 16.63 | calculated | this paper |
| 52.83 | 99.1 | 16.18 | measured | 10.11 | calculated | this paper |
| 62.09 | 95.73 | 16.2 | measured | 10.12 | calculated | this paper |
| 71.45 | 133.43 | 24.07 | measured | 15.04 | calculated | this paper |
| 69.77 | 138.46 | 21.84 | measured | 13.65 | calculated | this paper |
| 77.3 | 121.06 | 18.91 | measured | 11.82 | calculated | this paper |
| 132.92 | 238.36 | 25.25 | measured | 15.78 | calculated | this paper |
| 96.32 | 192.6 | 26.66 | measured | 16.66 | calculated | this paper |
| 82.31 | 109.01 | 16.2 | measured | 10.12 | calculated | this paper |
| 96.8 | 138.89 | 27.95 | measured | 17.47 | calculated | this paper |
| 94.8 | 187.96 | 19.51 | measured | 12.19 | calculated | this paper |
| 61.11 | 97.35 | 19.55 | measured | 12.22 | calculated | this paper |
| 190.09 | 239.49 | 27.05 | measured | 16.90 | calculated | this paper |
| 6 | 109°15'43"E | 38°48'30"N | 93.75 | 183.33 | 20.15 | measured | 12.59 | calculated | this paper |
| 64.88 | 117 | 12.83 | measured | 8.02 | calculated | this paper |
| 128.28 | 168.05 | 28.86 | measured | 18.03 | calculated | this paper |
| 67.87 | 94.11 | 15.08 | measured | 9.42 | calculated | this paper |
| 80.35 | 125.32 | 18.44 | measured | 11.52 | calculated | this paper |
| 69.5 | 113.91 | 15.68 | measured | 9.80 | calculated | this paper |
| 98.18 | 149.59 | 17.57 | measured | 10.98 | calculated | this paper |
| 157.66 | 177.8 | 32.91 | measured | 20.56 | calculated | this paper |
| 132.33 | 252.78 | 18.84 | measured | 11.77 | calculated | this paper |
| 67.42 | 180.11 | 16.63 | measured | 10.39 | calculated | this paper |
| 232.54 | 373.44 | 40.92 | measured | 25.57 | calculated | this paper |
| 160.7 | 256.09 | 37.61 | measured | 23.50 | calculated | this paper |
| 155.43 | 216.45 | 25.2 | measured | 15.75 | calculated | this paper |
| 163.07 | 254.27 | 24 | measured | 15.00 | calculated | this paper |
| 47.61 | 111.57 | 11.61 | measured | 7.25 | calculated | this paper |
| 40.76 | 71.72 | 9.09 | measured | 5.68 | calculated | this paper |
| 74.29 | 157.66 | 14.93 | measured | 9.33 | calculated | this paper |
| 104.75 | 233.74 | 15.35 | measured | 9.59 | calculated | this paper |
| 7 | 107°42'0"E | 38°49'46"N | 68.74 | 131.3 | 4.32 | measured | 2.70 | calculated | this paper |
| 62.1 | 151.76 | 6.87 | measured | 4.29 | calculated | this paper |
| 81.64 | 138.24 | 8.66 | measured | 5.41 | calculated | this paper |
| 88.91 | 118.28 | 8.21 | measured | 5.13 | calculated | this paper |
| 95.94 | 227.1 | 11.56 | measured | 7.22 | calculated | this paper |
| 76.81 | 112.94 | 6.66 | measured | 4.16 | calculated | this paper |
| 58.35 | 97.22 | 8.52 | measured | 5.32 | calculated | this paper |
| 8 | 108°42'59"E | 38°30'33"N | 81.58 | 122.31 | 8.30 | measured | 5.19 | calculated | this paper |
| 49.98 | 83.11 | 7.58 | measured | 4.74 | calculated | this paper |
| 45.24 | 82.94 | 5.55 | measured | 3.47 | calculated | this paper |
| 95.54 | 144.19 | 25.18 | measured | 15.73 | calculated | this paper |
| 97.66 | 175.71 | 7.39 | measured | 4.62 | calculated | this paper |
| 62.72 | 92.72 | 14.46 | measured | 9.04 | calculated | this paper |
| 69.72 | 120.38 | 19.87 | measured | 12.42 | calculated | this paper |
| 56.24 | 85.4 | 5.57 | measured | 3.48 | calculated | this paper |
| 79.11 | 87.3 | 13.02 | measured | 8.14 | calculated | this paper |
| 81.39 | 141.46 | 9.59 | measured | 5.99 | calculated | this paper |
| 100.92 | 194.23 | 10.63 | measured | 6.64 | calculated | this paper |
| 92.02 | 122.22 | 16.62 | measured | 10.39 | calculated | this paper |
| 87.91 | 178.63 | 23.36 | measured | 14.60 | calculated | this paper |
| 65.38 | 104.44 | 13.33 | measured | 8.33 | calculated | this paper |
| 75.76 | 200.66 | 17.82 | measured | 11.14 | calculated | this paper |
| 95.25 | 191.82 | 11.74 | measured | 7.34 | calculated | this paper |
| 66.22 | 114.94 | 16.18 | measured | 10.11 | calculated | this paper |
| 80.61 | 120.19 | 10.55 | measured | 6.59 | calculated | this paper |
| 84.74 | 150.19 | 15.63 | measured | 9.77 | calculated | this paper |
| 40.32 | 81.19 | 6.23 | measured | 3.89 | calculated | this paper |
| 42.89 | 86.63 | 7.02 | measured | 4.39 | calculated | this paper |
| 51.54 | 89.04 | 9.25 | measured | 5.78 | calculated | this paper |
| 9 | 108°38'38"E | 39°09'18"N | 208.84 | 278.23 | 20.82 | measured | 13.01 | calculated | this paper |
| 137.97 | 229.27 | 19.68 | measured | 12.30 | calculated | this paper |
| 214.88 | 352.57 | 31.06 | measured | 19.41 | calculated | this paper |
| 95.12 | 107.48 | 20.41 | measured | 12.75 | calculated | this paper |
| 156.42 | 244.74 | 20.87 | measured | 13.04 | calculated | this paper |
| 197.92 | 220.65 | 31.53 | measured | 19.70 | calculated | this paper |
| 133.62 | 162.2 | 14.34 | measured | 8.96 | calculated | this paper |
| 101.37 | 168.05 | 26.45 | measured | 16.53 | calculated | this paper |
| 86.77 | 223.38 | 15.81 | measured | 9.88 | calculated | this paper |
| 94.62 | 196.46 | 16.82 | measured | 10.51 | calculated | this paper |
| 108.86 | 183.24 | 16.16 | measured | 10.10 | calculated | this paper |
| 74.77 | 113.42 | 16.68 | measured | 10.42 | calculated | this paper |
| 88.8 | 159.47 | 16.31 | measured | 10.19 | calculated | this paper |
| 121.13 | 200.91 | 19.7 | measured | 12.31 | calculated | this paper |
| 139.14 | 259.52 | 17.21 | measured | 10.75 | calculated | this paper |
| 155.72 | 280.47 | 24.91 | measured | 15.57 | calculated | this paper |
| 136.84 | 198.05 | 20.23 | measured | 12.64 | calculated | this paper |
| 116.67 | 179.5 | 17.52 | measured | 10.95 | calculated | this paper |
| 10 | 108°44'35"E | 39°03'30"N | 194.38 | 279.44 | 28.35 | measured | 17.72 | calculated | this paper |
| 212.12 | 306.15 | 28.99 | measured | 18.11 | calculated | this paper |
| 180.05 | 185.68 | 35.6 | measured | 22.25 | calculated | this paper |
| 154.7 | 245.72 | 19.67 | measured | 12.29 | calculated | this paper |
| 121.61 | 269.68 | 14.83 | measured | 9.27 | calculated | this paper |
| 114.16 | 190.42 | 13.95 | measured | 8.72 | calculated | this paper |
| 115.62 | 173.58 | 17.4 | measured | 10.87 | calculated | this paper |
| 140.05 | 239.57 | 27.6 | measured | 17.25 | calculated | this paper |
| 134.2 | 149.26 | 27.88 | measured | 17.42 | calculated | this paper |
| Max | | | 232.54 | 373.44 | 40.92 | analyzed | 25.56965 | analyzed | all data |
| Min | | | 37.77 | 40 | 1 | analyzed | 0.624869 | analyzed | all data |
| Mean | | | 89.97775 | 148.6151 | 15.26475 | analyzed | 9.547108 | analyzed | all data |
| Standard deviation | | | 37.98907 | 60.69565 | 7.397444 | analyzed | 4.621932 | analyzed | all data |
| Coefficient of variance | | | 42.22051 | 40.84085 | 48.46096 | analyzed | 48.41185 | analyzed | all data |
| Total | | | 160 | 160 | 160 | analyzed | 160 | analyzed | all data |
| Total | | | | 375 | 366 | 374 | analyzed | 375 | analyzed | all data |
